# Supplementary material for: Design of a randomized cross-over study evaluating effects of carbohydrate intake on glycemic control in persons with type 1 diabetes
Source: PubMed Central journal article supplement (PMC10041710; doi:10.3389/fnut.2023.1114317), 2023-03-13
Supplement: Data_Sheet_3.pdf [file Data_Sheet_3.pdf]

## *Supplementary Material*

**Design of a randomized cross-over study evaluating effects of carbohydrate intake on glycemic control in persons with type 1 diabetes**

**Sofia Sterner Isaksson\*, Arndís F. Ólafsdóttir, Marcus Lind**

\* **Correspondence:** Sofia Sterner Isaksson: [sofia.isaksson.2@gu.se](mailto:sofia.isaksson.2@gu.se)

### **Supplementary Material**

Supplementary Material 1: Basal insulin adjustments during the study

Supplementary Material 2: SPIRIT 2013 checklist
